# Supplementary material
Source: publisher figshare collection journal article supplement (https://acs.figshare.com/ndownloader/files/4378015)

Supporting Information.  $^1\text{H}$  NMR spectra of monomers **M2** and **MOHa**

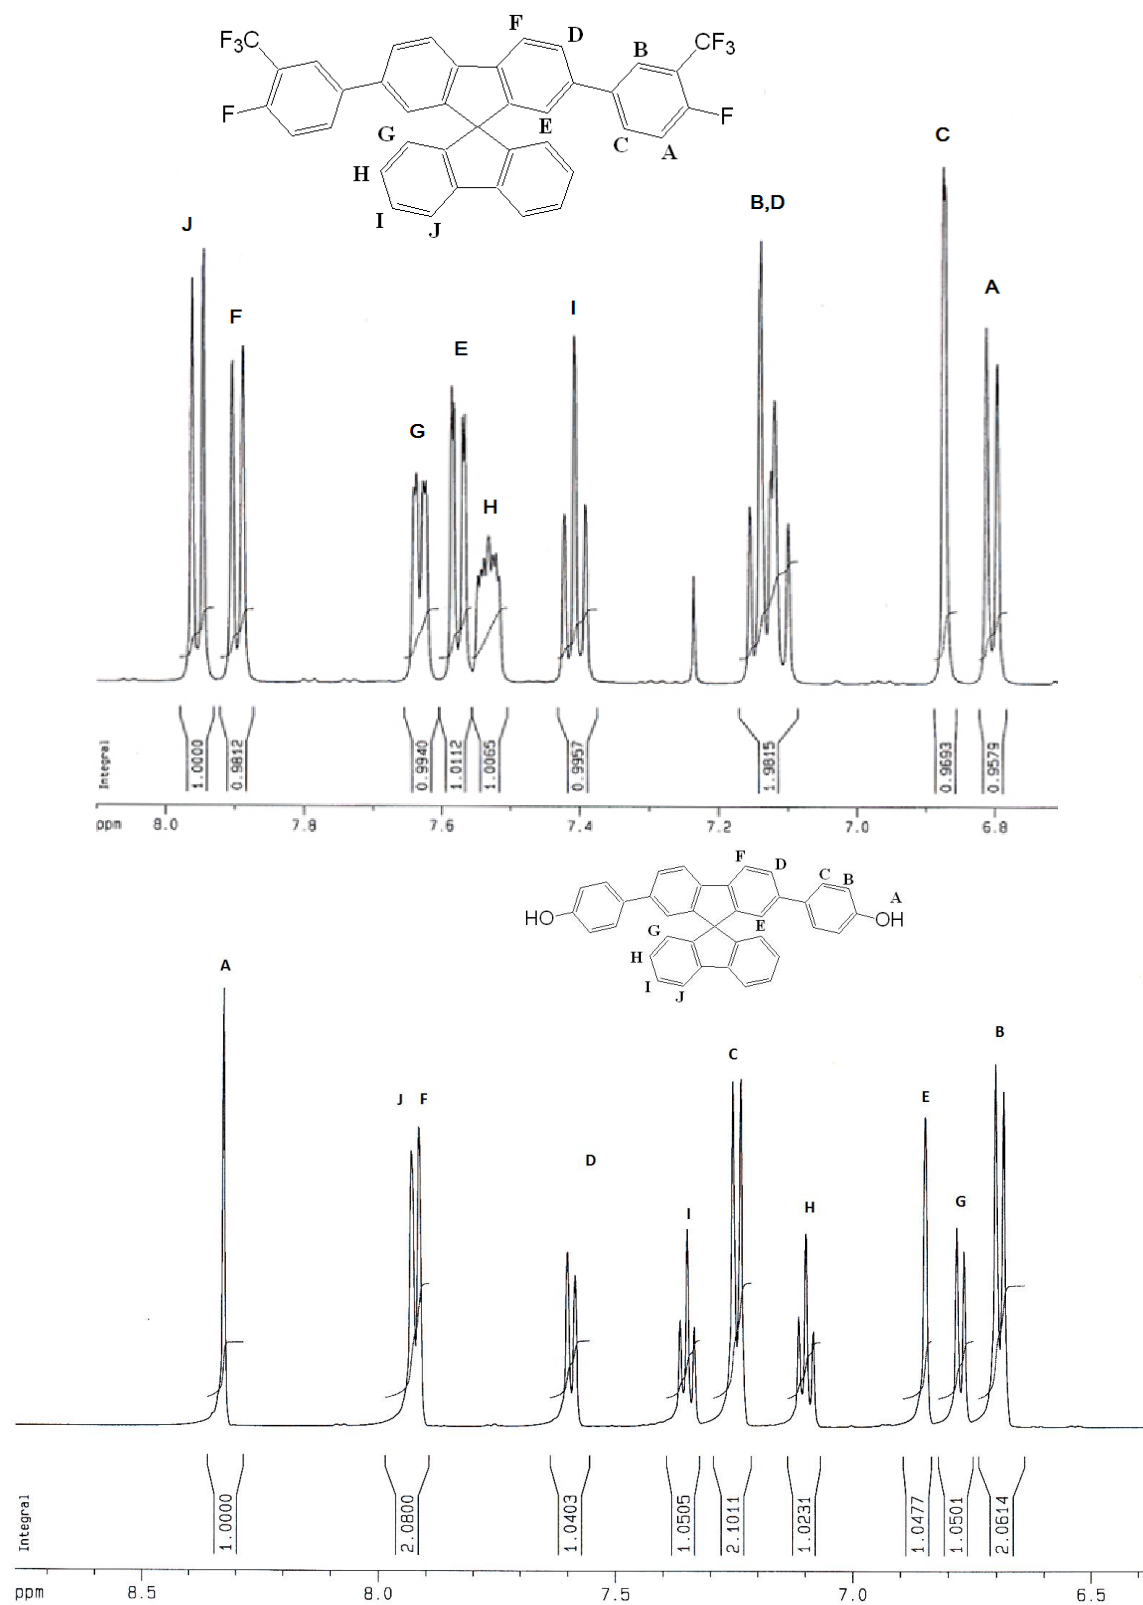

Supplement: Supplementary file 1 [file 4378015]
